# Supplementary material
Source: PubMed Central journal article supplement (PMC5953786)
Supplement: NIHMS936303-supplement-Supp_PDF.pdf [file NIHMS936303-supplement-Supp_PDF.pdf]

**SUPPLEMENTARY MATERIAL**

**Supplemental figures:**

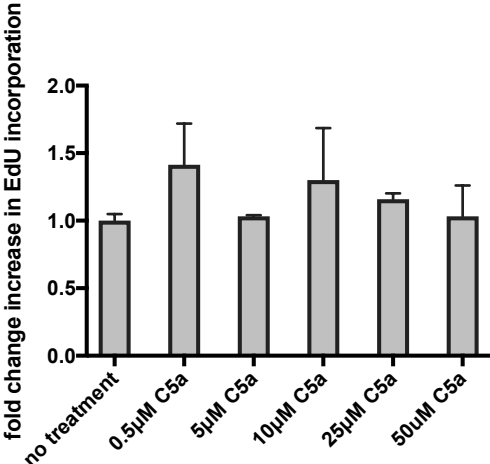

**Figure S1:** Cardiomyocyte proliferation in C5aR1 knock-out and wild-type neonatal cardiomyocytes, effect of C5a agonist and C5aR1 inhibitor PMX205 on cardiomyocyte proliferation, quantified using EdU incorporation.

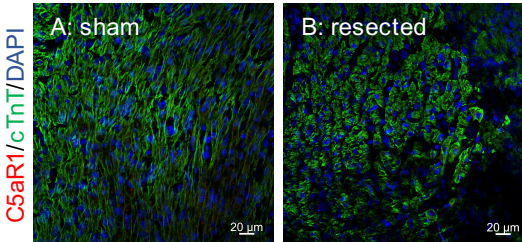

**Figure S2: C5aR1 antibody validation:** C5aR1 staining is absent in hearts of neonatal C5aR1 knock-out mice, 48 hours post resection, resected (A), sham (B); C5aR1 (red), cardiac troponin T (green), nuclei (blue); scale bar - 20µm

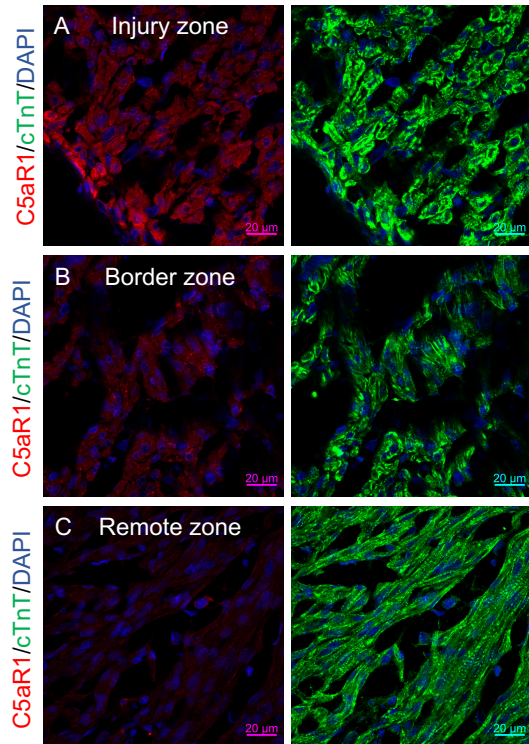

**Figure S3: C5aR1 expression (red) in injured zone (A), border zone (B) and remote zone (C).** Expression of C5aR1 is observed in the injured zone of neonatal mouse heart, 48 hours post-resection (A), but not in the border zone (B) and the remote zone (C).

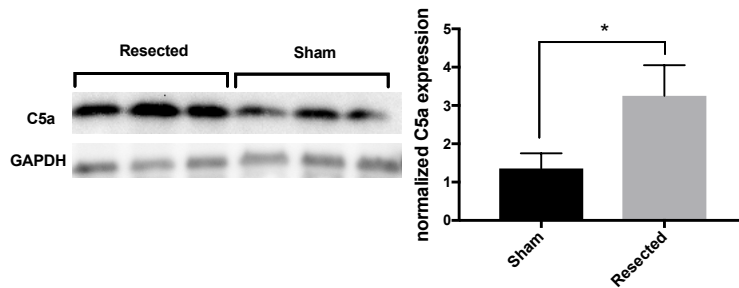

**Figure S4: C5a levels are significantly higher in the neonatal murine heart 48 hours post – resection.** n=3, all groups; \*p<0.05.

macrophage infiltration - 48 hours post injury

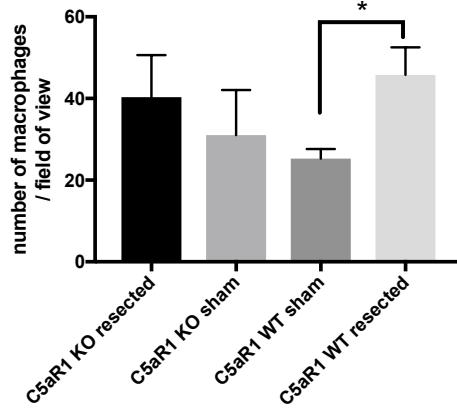

**Figure S5:** Quantification of macrophage infiltration of injured zone in C5aR1 knock-out and wild-type mice. N=3, all groups; \*p<0.05. Quantification was performed by immunostaining of heart sections.

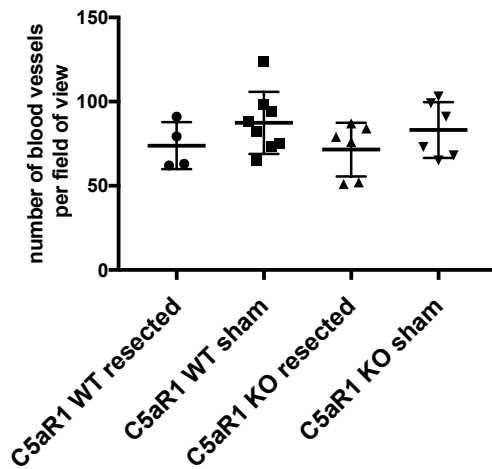

**Figure S6:** Quantification of CD31 positive blood vessels in C5aR1 wild-type and knock-out mice, 7 days post-resection. n≥3 (all groups).
